# Supplementary material
Source: Springer Nature journal article supplement (https://www.springermedizin.de/resource/supplementary/12939_2007_132_MOESM1_ESM.pdf/9551550)
Supplement: MOESM1 [file 9551550]

**MMR per 100000 live births**

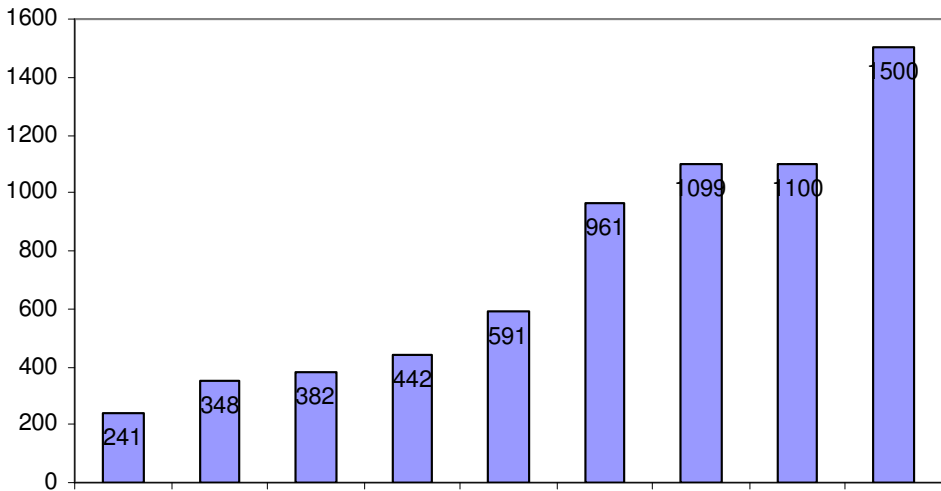

Kwimba district 1989-1991

AMMP Hai district 1992-99

HLH catchment area 1995/1996

Kwimba/Missungwi districts 2000

AMMP Dar es Salaam 1992-99

Bagamoyo district 1993

AMMP Morogoro 1992-99

WHO Tanzania 1995

WHO Tanzania 2000
